# Supplementary material
Source: PubMed Central journal article supplement (PMC6531626)
Supplement: JB.00173-19-s0001.pdf [file JB.00173-19-s0001.pdf]

# **Role and recruitment of the TagL peptidoglycan-binding protein during Type VI secretion system biogenesis**

Yoann G. Santin, Claire E. Camy, Abdelrahim Zoued<sup>†</sup>, Thierry Doan, Marie-Stéphanie Aschtgen<sup>§</sup>, and Eric Cascales\*

## **Supplemental Data**

**Table S1.** Strains, plasmids and oligonucleotides used in this study.

**Figure S1.** sfGFP-TagL is functional.

**Figure S2.** Impact of T6SS subunits on TagL localization.

**Figure S3.** Impact of TagL on T6SS subunits localization.

**Figure S4.** Impact of TagL on TssA and TssM recruitment and dynamics.

**Table S1. Strains, plasmids and oligonucleotides used in this study.**

## STRAINS

| Strains                                   | Description and genotype                                                                                                                              | Source                 |
|-------------------------------------------|-------------------------------------------------------------------------------------------------------------------------------------------------------|------------------------|
| <i>Escherichia coli</i> K12               |                                                                                                                                                       |                        |
| DH5 $\alpha$                              | F-, $\Delta$ ( <i>argF-lac</i> )U169, <i>phoA</i> , <i>supE44</i> , $\Delta$ ( <i>lacZ</i> )M15, <i>relA</i> , <i>endA</i> , <i>thi</i> , <i>hsdR</i> | Laboratory collection  |
| W3110                                     | F-, lambda-IN( <i>rrnD-rrnE</i> )1 <i>rph-1</i>                                                                                                       | Laboratory collection  |
| Enteroaggregative <i>Escherichia coli</i> |                                                                                                                                                       |                        |
| 17-2                                      | Wild-type                                                                                                                                             | Laboratory collection  |
| 17-2 $\Delta$ <i>tagL</i>                 | Deletion of the <i>tagL</i> gene (EC042_4528) in 17-2                                                                                                 | Aschtgen et al., 2010a |
| 17-2 $\Delta$ <i>tssL</i>                 | Deletion of the <i>tssL</i> gene (EC042_4527) in 17-2                                                                                                 | Aschtgen et al., 2010a |
| 17-2 $\Delta$ <i>tssL-tagL</i>            | Deletion of the <i>tssL</i> (EC042_4527) and <i>tagL</i> (EC042_4528) genes in 17-2                                                                   | This study             |
| 17-2 $\Delta$ <i>tssM</i>                 | Deletion of the <i>tssM</i> gene (EC042_4539) in 17-2                                                                                                 | Aschtgen et al., 2010a |
| 17-2 $\Delta$ <i>tssJ</i>                 | Deletion of the <i>tssJ</i> gene (EC042_4544) in 17-2                                                                                                 | Aschtgen et al., 2008  |
| 17-2 $\Delta$ <i>mltE</i>                 | Deletion of the <i>mltE</i> gene (EC042_1244) in 17-2                                                                                                 | Santin et al., 2017    |
| 17-2 $\Delta$ <i>tssK</i>                 | Deletion of the <i>tssK</i> gene (EC042_4526) in 17-2                                                                                                 | Zoued et al., 2013     |
| 17-2 $\Delta$ <i>tssA</i>                 | Deletion of the <i>tssA</i> gene (EC042_4540) in 17-2                                                                                                 | Zoued et al., 2016     |
| 17-2 $\Delta$ <i>tssBC</i>                | Deletion of the <i>tssB</i> (EC042_4524) and <i>tssC</i> (EC042_4525) genes in 17-2                                                                   | Brunet et al., 2015    |
| 17-2 sfGFP-TagL                           | Insertion of the <i>sfGFP</i> coding sequence at the 5' of <i>tagL</i> in 17-2                                                                        | This study             |
| $\Delta$ <i>tssL</i> sfGFP-TagL           | Insertion of the <i>sfGFP</i> coding sequence at the 5' of <i>tagL</i> in 17-2 $\Delta$ <i>tssL</i>                                                   | This study             |
| $\Delta$ <i>tssM</i> sfGFP-TagL           | Insertion of the <i>sfGFP</i> coding sequence at the 5' of <i>tagL</i> in 17-2 $\Delta$ <i>tssM</i>                                                   | This study             |
| $\Delta$ <i>tssJ</i> sfGFP-TagL           | Insertion of the <i>sfGFP</i> coding sequence at the 5' of <i>tagL</i> in 17-2 $\Delta$ <i>tssJ</i>                                                   | This study             |
| $\Delta$ <i>mltE</i> sfGFP-TagL           | Insertion of the <i>sfGFP</i> coding sequence at the 5' of <i>tagL</i> in 17-2 $\Delta$ <i>mltE</i>                                                   | This study             |
| $\Delta$ <i>tssK</i> sfGFP-TagL           | Insertion of the <i>sfGFP</i> coding sequence at the 5' of <i>tagL</i> in 17-2 $\Delta$ <i>tssK</i>                                                   | This study             |
| $\Delta$ <i>tssA</i> sfGFP-TagL           | Insertion of the <i>sfGFP</i> coding sequence at the 5' of <i>tagL</i> in 17-2 $\Delta$ <i>tssA</i>                                                   | This study             |
| $\Delta$ <i>tssBC</i> sfGFP-TagL          | Insertion of the <i>sfGFP</i> coding sequence at the 5' of <i>tagL</i> in 17-2 $\Delta$ <i>tssBC</i>                                                  | This study             |
| 17-2 TssB-mCh                             | Insertion of the <i>mCherry</i> coding sequence at the 3' of <i>tssB</i> in 17-2                                                                      | Durand et al., 2015    |
| 17-2 sfGFP-TssL                           | Insertion of the <i>sfGFP</i> coding sequence at the 5' of <i>tssL</i> in 17-2                                                                        | Durand et al., 2015    |

|                          |                                                                                         |                     |
|--------------------------|-----------------------------------------------------------------------------------------|---------------------|
| 17-2 mCh-TssL            | Insertion of the <i>mCherry</i> coding sequence at the 5' of <i>tssL</i> in 17-2        | Durand et al., 2015 |
| 17-2 sfGFP-TssM          | Insertion of the <i>sfGFP</i> coding sequence at the 5' of <i>tssM</i> in 17-2          | Durand et al., 2015 |
| 17-2 sfGFP-TssA          | Insertion of the <i>sfGFP</i> coding sequence at the 5' of <i>tssA</i> in 17-2          | Zoued et al., 2016  |
| 17-2 TssK-sfGFP          | Insertion of the <i>sfGFP</i> coding sequence at the 3' of <i>tssK</i> in 17-2          | Brunet et al., 2015 |
| 17-2 TssB-mCh sfGFP-TagL | Insertion of the <i>sfGFP</i> coding sequence at the 5' of <i>tagL</i> in 17-2 TssB-mCh | This study          |
| 17-2 mCh-TssL sfGFP-TagL | Insertion of the <i>sfGFP</i> coding sequence at the 5' of <i>tagL</i> in 17-2 mCh-TssL | This study          |
| $\Delta tagL$ TssB-mCh   | Deletion of the <i>tagL</i> gene (EC042_4528) in 17-2 TssB-mCh                          | This study          |
| $\Delta tagL$ sfGFP-TssL | Deletion of the <i>tagL</i> gene (EC042_4528) in 17-2 sfGFP-TssL                        | This study          |
| $\Delta tagL$ sfGFP-TssM | Deletion of the <i>tagL</i> gene (EC042_4528) in 17-2 sfGFP-TssM                        | This study          |
| $\Delta tagL$ sfGFP-TssA | Deletion of the <i>tagL</i> gene (EC042_4528) in 17-2 sfGFP-TssA                        | This study          |
| $\Delta tagL$ TssK-sfGFP | Deletion of the <i>tagL</i> gene (EC042_4528) in 17-2 TssK-sfGFP                        | This study          |

## PLASMIDS

| Plasmid               | Description and main characteristics                                                               | Source                    |
|-----------------------|----------------------------------------------------------------------------------------------------|---------------------------|
| pKD4                  | Kan <sup>R</sup> cassette flanked by FRT sites, R6K origin, Kan <sup>R</sup> , Amp <sup>R</sup>    | Datsenko and Wanner, 2000 |
| pKD4-Nter-sfGFP       | <i>sfGFP</i> -coding sequence cloned downstream the Kan <sup>R</sup> cassette in pKD4              | Durand et al., 2015       |
| pFPV-mCherry          | <i>mCherry</i> under <i>rpsM</i> promoter, Amp <sup>R</sup>                                        | Drecktrah et al., 2008    |
| pASK-IBA37(+)         | Expression vector, AHT-inducible, ColE1 origin, Amp <sup>R</sup>                                   | IBA technology            |
| pIBA-TagL             | <i>tagL</i> gene cloned into pASK-IBA37(+), N-terminal 6×His tag coding sequence                   | Aschtgen et al., 2010a    |
| pIBA-TagL $\Delta_p$  | TAA stop codon inserted at codon Met-366 in pIBA-TagL                                              | This study                |
| pIBA-TssL             | <i>tssL</i> gene cloned into pASK-IBA37(+), C-terminal FLAG epitope coding sequence                | Aschtgen et al., 2012     |
| pIBA-TagL-TssL        | 6×His <i>tagL</i> and <i>tssL</i> -FLAG cloned into pASK-IBA37(+)                                  | This study                |
| pIBA-TssL-PG          | wild-type PGB domain of <i>tagL</i> (residues 365-576) fused to the C-terminus of <i>tssL</i>      | Aschtgen et al., 2012     |
| pIBA-TssL-PG*         | substituted PGB domain of <i>tagL</i> fused to the C-terminus of <i>tssL</i>                       | This study                |
| pMS600                | pOK12 vector, <i>EcoRI-XbaI-XhoI</i> linker, P15A origin, Kan <sup>R</sup>                         | Aschtgen et al., 2008     |
| pOK-Hcp-HA            | <i>hcp</i> gene cloned into pMS600, N-terminal HA epitope coding sequence                          | Aschtgen et al., 2010a    |
| pOK-TssL-HA           | <i>tssL</i> gene cloned into pMS600, N-terminal HA epitope coding sequence                         | Aschtgen et al., 2010a    |
| pOK-TssL <sub>C</sub> | <i>tssL<sub>C</sub></i> (residues 1-184) cloned into pMS600, N-terminal HA epitope coding sequence | This study                |

## OLIGONUCLEOTIDES

| Oligonucleotide                                | Sequence (5' to 3')                                                                                           |
|------------------------------------------------|---------------------------------------------------------------------------------------------------------------|
| <b>Strain construction<sup>a</sup></b>         |                                                                                                               |
| Del-4527-5/DW                                  | <u>CATCGCTGGGAGATGTGAAACTGGAAC</u> TTTTGCGGTGCTGCGGACATGAATGTGTAGGCTGGAGCTGCTTCG                              |
| Del-4528-5/DW                                  | TCTTCTGTGCTTGCAGACCAGGTGGCACGGCTTACCGGGCAGGGATAACCTGTGTAGGCTGGAGCTGCTTCG                                      |
| Del-4528-3/DW                                  | <u>ATATCTGCACCGCCATCATCTTTCAGCCACAGATAAACTGGAATTGCCATCATATGAATATCCTCCTTAGTTCC</u>                             |
| 5-sfGFP-TagL-DW                                | <u>GTGTGTGCTTTCTTCTGTGCTTGCAGACCAGGTGGCACGGCTTACCGGGCAGGGATAACCCGATTGTGTAGGCT</u><br>GGAGCTGCTTCGAAGTTCCTATAC |
| 3-sfGFP-TagL-DW                                | <u>AATCAGCCACAGTGTCAAGAACAGACTCAGTATTGTCAGCCAGAGACGGGAACGTACGTGCCCTCCGCCGGCC</u><br>GCTGC                     |
| <b>Plasmid construction<sup>b,c,d,e</sup></b>  |                                                                                                               |
| 5'-TssL-pIBATagL                               | <u>GACAAAAATCTAGAAATAATTTTGTTTAACTTTAAGAAGGAGATATACAAATGAATAAACCTGTTATCTCCCGG</u><br>GC                       |
| 3'-TssL-pIBATagL                               | <u>GATGGTGATGGTGATGCGATCCTCTGCTAGCTTATTTATCATCGTCGTCTTTATAATCTCCCTGCCCGGTAAGCCG</u>                           |
| 5'EcoRI-4527                                   | GTCGgaattcTACTTTCTACACCCCGGCATCGC                                                                             |
| 3'XhoI-4527-deltaTM                            | CTGCctcgagCAACCAGTACATCGTTCTGCCAGCAC                                                                          |
| 4527-Fus-PG(28)-5                              | <u>GCTGGCTGGTCTCTGGTGTGTGCTTTCTTCTCTGGTTCGCAGCGTGGGGGAAC</u>                                                  |
| 4527-Fus-PG(28)-3                              | <u>GCGTGCCACCTGGTCTGCAAGCAC</u> <u>TTAGCAACACCCGGGGCAGCACTCCGTTATGTTTTCTGATGCGCCCTCTTC</u>                    |
| <b>Site-directed mutagenesis<sup>f,g</sup></b> |                                                                                                               |
| A-TagL-M366Stop                                | CTGACGGCCTGGCACCGG <sup>taa</sup> CGCGGATATTCATCTG                                                            |
| B-TagL-M366Stop                                | CAGATGAATATCCGCG <sup>tta</sup> CCGGTGCCAGGCCGTCAG                                                            |

<sup>a</sup> 50-bp upstream/downstream regions of the site of deletion/insertion underlined.

<sup>b</sup> restriction site in lower case (*Eco*RI at the 5' end, GAATTC; *Xho*I at the 3' end, CTCGAG).

<sup>c</sup> sequence annealing on target vector underlined.

<sup>d</sup> FLASH-tag coding sequence italicized.

<sup>e</sup> FLAG-tag coding sequence italicized.

<sup>f</sup> mutagenized codons in lower case.

<sup>g</sup> base substitutions underlined.

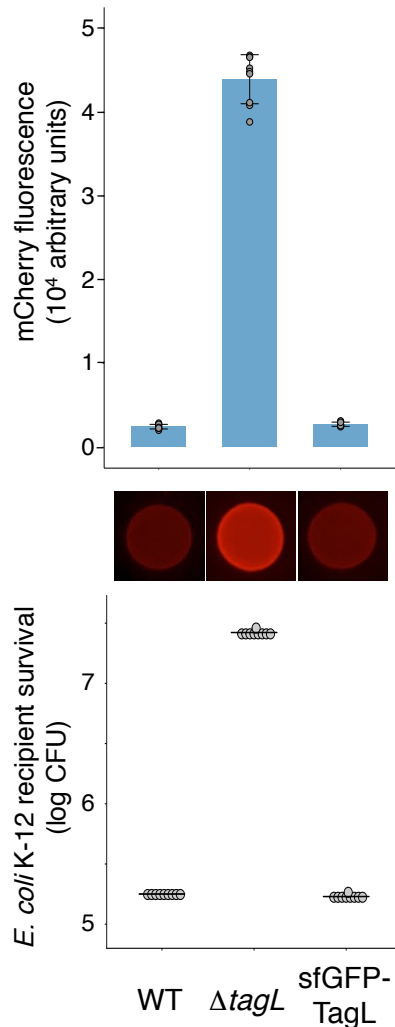

**Figure S1. sfGFP-TagL is functional.** *E. coli* K-12 recipient cells (W3110 mCherry, AmpR) were mixed with the indicated attacker cells, spotted onto SIM agar plates and incubated for 4 h at 37 °C. The image of a representative bacterial spot is shown below the graph reporting the fluorescence level of the spots (in arbitrary units). The average fluorescence and standard deviation are indicated, as well as the values from nine independent measurements (grey dots). The lower graph reports the number of surviving *E. coli* recipient cells [counted on selective ampicillin medium; in  $\log_{10}$  of colony-forming units (cfu)]. The grey dots correspond to the nine values from three independent biological replicates. The average is indicated by the horizontal bar.

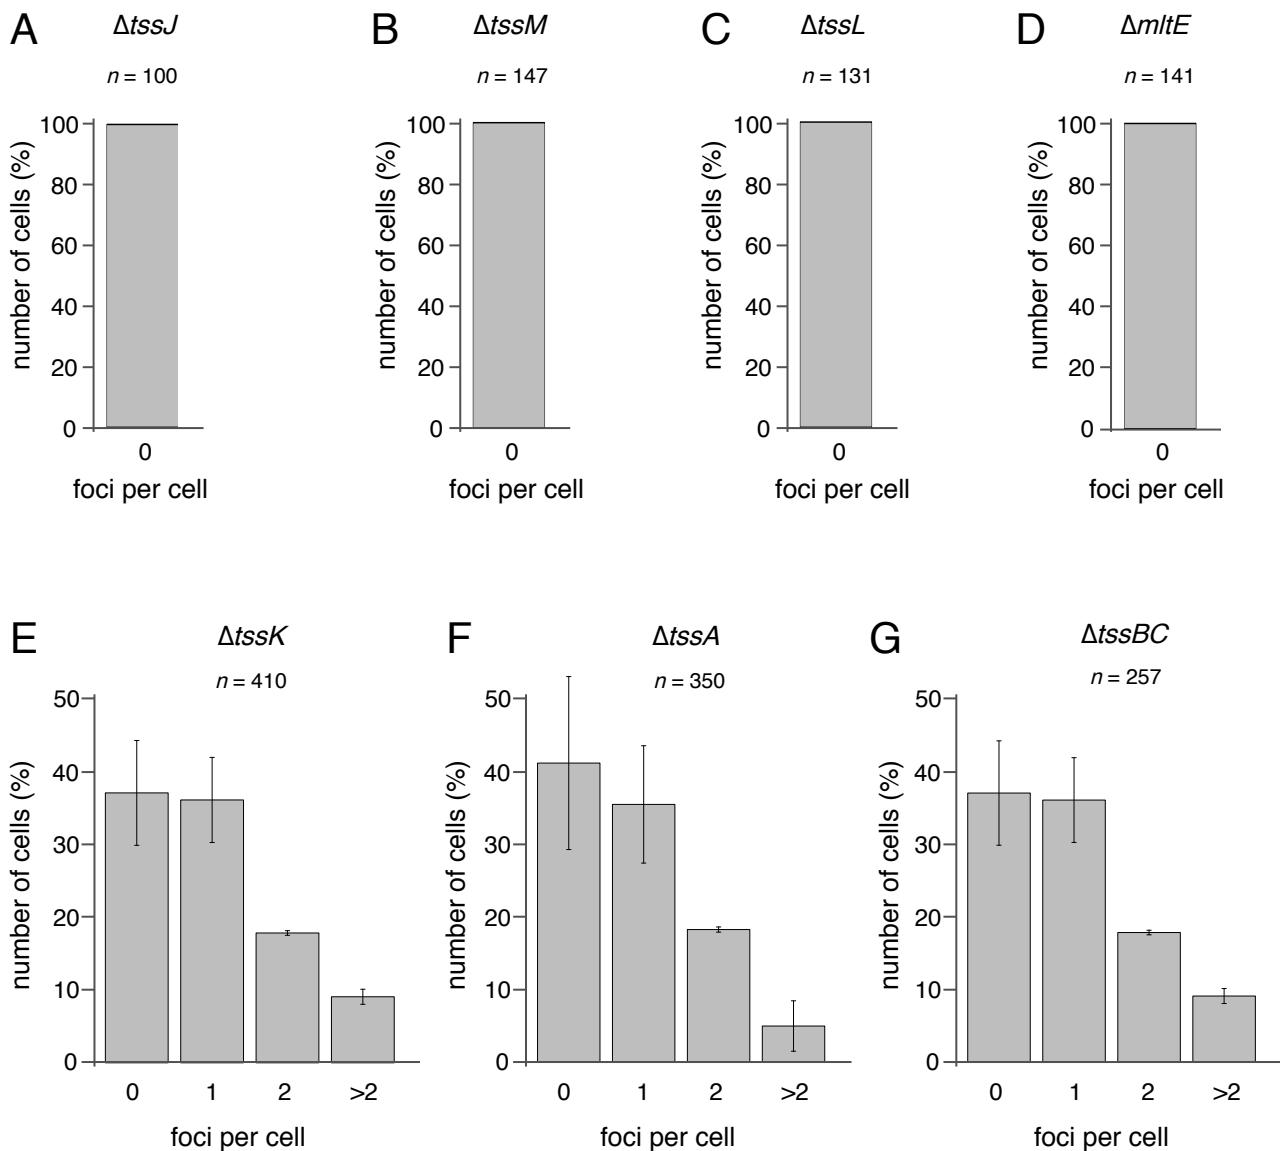

**Figure S2. Impact of T6SS subunits on TagL localization.** Number of sfGFP-TagL foci per cell in  $\Delta tssJ$  (A),  $\Delta tssM$  (B),  $\Delta tssL$  (C),  $\Delta mltE$  (D),  $\Delta tssK$  (E),  $\Delta tssA$  (F), and  $\Delta tssBC$  (G) cells. The number of analyzed cells ( $n$ ) from representative fields of three biological replicates is indicated on top of each graph.

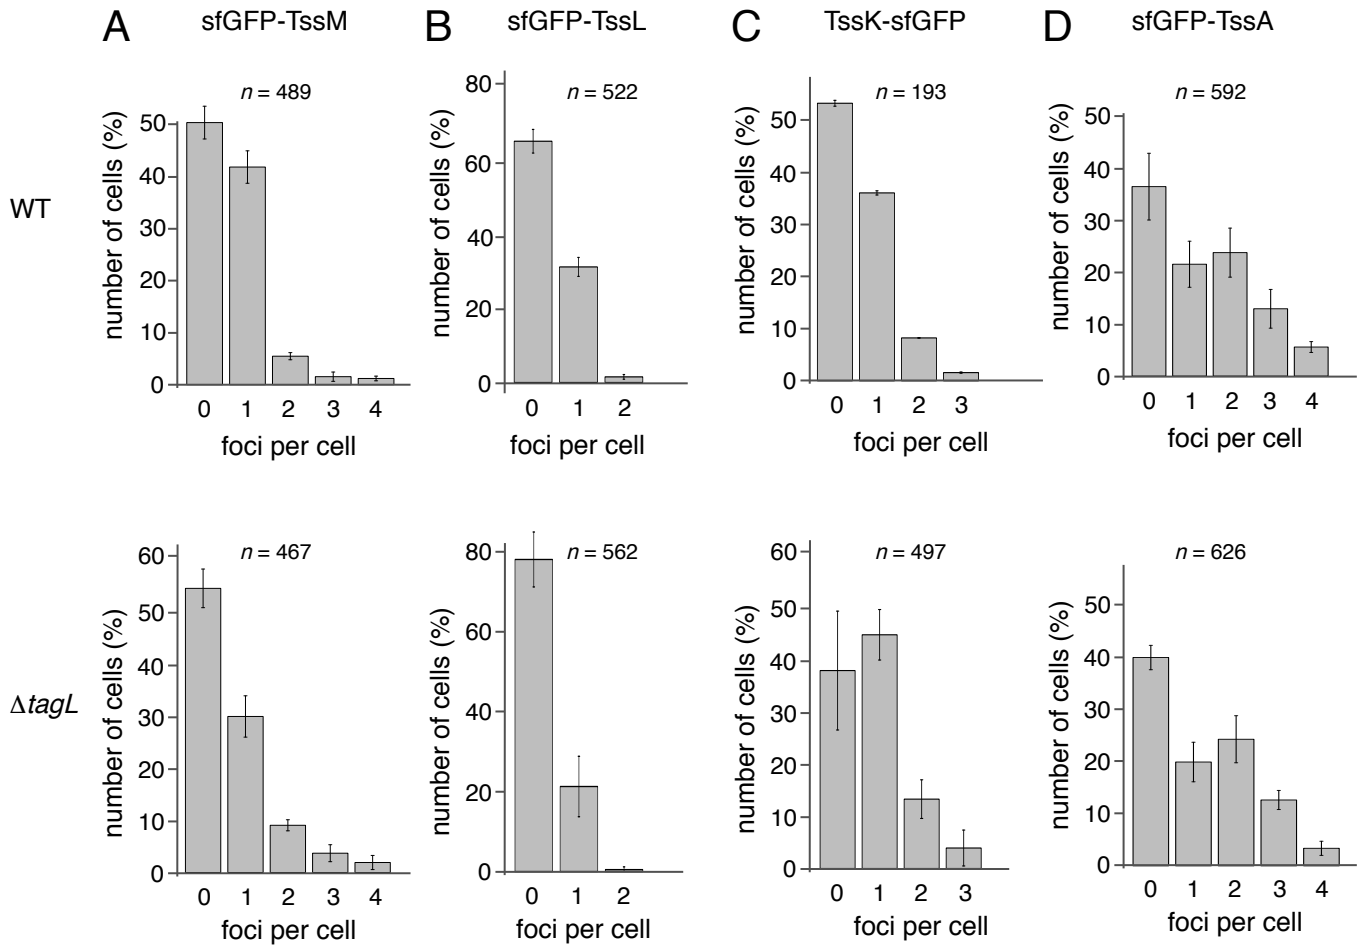

**Figure S3. Impact of TagL on T6SS subunits localization.** Number of sfGFP-TssM (A), sfGFP-TssL (B), TssK-sfGFP (C), and sfGFP-TssA (D) foci per cell in wild-type (upper graphs) and  $\Delta tagL$  (lower graphs) cells. The number of analyzed cells ( $n$ ) from representative fields of three biological replicates is indicated on top of each graph.

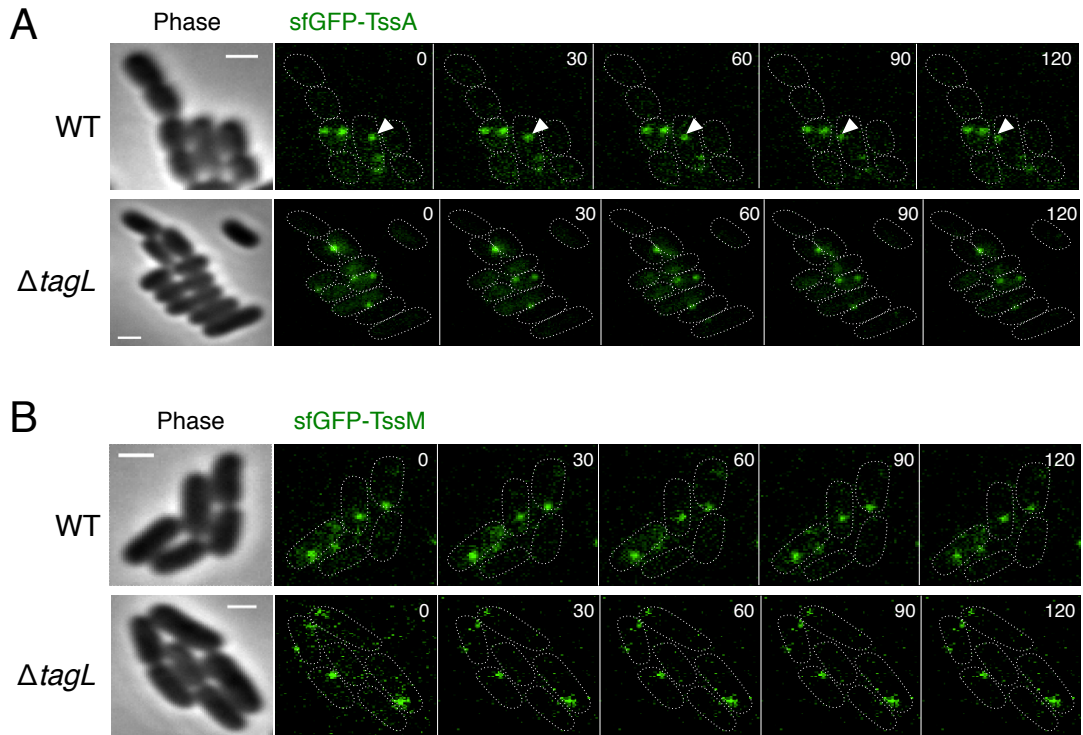

**Figure S4. Impact of TagL on TssA and TssM recruitment and dynamics.** Representative fluorescence microscopy time-lapse recordings of wild-type (WT, upper panels) or  $\Delta tagL$  (lower panels) cells producing sfGFP-TssA (A) or sfGFP-TssM (B). Individual images were taken every 30 s. White arrowheads indicate the localization and dynamics of a TssA focus. Scale bar is 1  $\mu\text{m}$ .
